# Supplementary material for: Global trends of hand and wrist trauma: a systematic analysis of fracture and digit amputation using the Global Burden of Disease 2017 Study
Source: HighWire-hosted journal article supplement (doi:10.1136/injuryprev-2019-043495), 2020-03-13
Supplement: injuryprev-2019-043495supp002_data_supplement.pdf [file injuryprev-2019-043495supp002_data_supplement.pdf]

## Appendix 2

GATHER checklist of information that should be included in reports of global health estimates, with description of compliance and location of information for GBD 2017.

| #                                                                                                     | GATHER checklist item                                                                                                                                                                                                                                                                                                                                                                   | Description of compliance                                                                                                                                                              | Reference                                                                                                            |
|-------------------------------------------------------------------------------------------------------|-----------------------------------------------------------------------------------------------------------------------------------------------------------------------------------------------------------------------------------------------------------------------------------------------------------------------------------------------------------------------------------------|----------------------------------------------------------------------------------------------------------------------------------------------------------------------------------------|----------------------------------------------------------------------------------------------------------------------|
| <b>Objectives and funding</b>                                                                         |                                                                                                                                                                                                                                                                                                                                                                                         |                                                                                                                                                                                        |                                                                                                                      |
| 1                                                                                                     | Define the indicators, populations, and time periods for which estimates were made.                                                                                                                                                                                                                                                                                                     | Narrative provided in paper and appendix describing indicators, definitions, and populations                                                                                           | Main text (Methods) and appendix                                                                                     |
| 2                                                                                                     | List the funding sources for the work.                                                                                                                                                                                                                                                                                                                                                  | Funding sources listed in paper                                                                                                                                                        | Summary (Funding)                                                                                                    |
| <b>Data Inputs</b>                                                                                    |                                                                                                                                                                                                                                                                                                                                                                                         |                                                                                                                                                                                        |                                                                                                                      |
| <i>For all data inputs from multiple sources that are synthesised as part of the study:</i>           |                                                                                                                                                                                                                                                                                                                                                                                         |                                                                                                                                                                                        |                                                                                                                      |
| 3                                                                                                     | Describe how the data were identified and how the data were accessed.                                                                                                                                                                                                                                                                                                                   | Narrative description of data seeking methods provided                                                                                                                                 | Main text (Methods) and appendix                                                                                     |
| 4                                                                                                     | Specify the inclusion and exclusion criteria. Identify all ad-hoc exclusions.                                                                                                                                                                                                                                                                                                           | Narrative about inclusion and exclusion criteria by data type provided; ad hoc exclusions in cause-specific write-ups                                                                  | Main text (Methods) and appendix                                                                                     |
| 5                                                                                                     | Provide information on all included data sources and their main characteristics. For each data source used, report reference information or contact name/institution, population represented, data collection method, year(s) of data collection, sex and age range, diagnostic criteria or measurement method, and sample size, as relevant.                                           | An interactive, online data source tool that provides metadata for data sources by component, geography, cause, risk, or impairment has been developed                                 | Online data citation tools:<br><a href="http://ghdx.healthdata.org/gbd-2017">http://ghdx.healthdata.org/gbd-2017</a> |
| 6                                                                                                     | Identify and describe any categories of input data that have potentially important biases (e.g., based on characteristics listed in item 5).                                                                                                                                                                                                                                            | Summary of known biases by cause included in appendix                                                                                                                                  | Appendix                                                                                                             |
| <i>For data inputs that contribute to the analysis but were not synthesised as part of the study:</i> |                                                                                                                                                                                                                                                                                                                                                                                         |                                                                                                                                                                                        |                                                                                                                      |
| 7                                                                                                     | Describe and give sources for any other data inputs.                                                                                                                                                                                                                                                                                                                                    | Included in online data source tool                                                                                                                                                    | <a href="http://ghdx.healthdata.org/gbd-2017">http://ghdx.healthdata.org/gbd-2017</a>                                |
| <i>For all data inputs:</i>                                                                           |                                                                                                                                                                                                                                                                                                                                                                                         |                                                                                                                                                                                        |                                                                                                                      |
| 8                                                                                                     | Provide all data inputs in a file format from which data can be efficiently extracted (e.g., a spreadsheet as opposed to a PDF), including all relevant meta-data listed in item 5. For any data inputs that cannot be shared due to ethical or legal reasons, such as third-party ownership, provide a contact name or the name of the institution that retains the right to the data. | Downloads of input data available through online tools, including data visualisation tools and data query tools; input data not available in tools will be made available upon request | Online data visualisation tools, data query tools, and the Global Health Data Exchange                               |
| <b>Data analysis</b>                                                                                  |                                                                                                                                                                                                                                                                                                                                                                                         |                                                                                                                                                                                        |                                                                                                                      |

|                               |                                                                                                                                                                                                                                                                         |                                                                                                                                               |                                                                                                                              |
|-------------------------------|-------------------------------------------------------------------------------------------------------------------------------------------------------------------------------------------------------------------------------------------------------------------------|-----------------------------------------------------------------------------------------------------------------------------------------------|------------------------------------------------------------------------------------------------------------------------------|
| 9                             | Provide a conceptual overview of the data analysis method. A diagram may be helpful.                                                                                                                                                                                    | Flow diagrams of the overall methodological processes, as well as cause-specific modelling processes, have been provided                      | Main text (Methods) and appendix                                                                                             |
| 10                            | Provide a detailed description of all steps of the analysis, including mathematical formulae. This description should cover, as relevant, data cleaning, data pre-processing, data adjustments and weighting of data sources, and mathematical or statistical model(s). | Flow diagrams and corresponding methodological write-ups for each cause, as well as the databases and modelling processes, have been provided | Main text (Methods) and appendix                                                                                             |
| 11                            | Describe how candidate models were evaluated and how the final model(s) were selected.                                                                                                                                                                                  | Provided in the methodological write-ups                                                                                                      | Appendix                                                                                                                     |
| 12                            | Provide the results of an evaluation of model performance, if done, as well as the results of any relevant sensitivity analysis.                                                                                                                                        | Provided in the methodological write-ups                                                                                                      | Appendix                                                                                                                     |
| 13                            | Describe methods for calculating uncertainty of the estimates. State which sources of uncertainty were, and were not, accounted for in the uncertainty analysis.                                                                                                        | Appendix                                                                                                                                      | Appendix                                                                                                                     |
| 14                            | State how analytic or statistical source code used to generate estimates can be accessed.                                                                                                                                                                               | Appendix                                                                                                                                      | <a href="http://ghdx.healthdata.org/gbd-2017/code">http://ghdx.healthdata.org/gbd-2017/code</a>                              |
| <b>Results and Discussion</b> |                                                                                                                                                                                                                                                                         |                                                                                                                                               |                                                                                                                              |
| 15                            | Provide published estimates in a file format from which data can be efficiently extracted.                                                                                                                                                                              | GBD 2017 results are available through online data visualisation tools, the Global Health Data Exchange, and the online data query tool       | Main text, and online data tools (data visualisation tools, data query tools, and the Global Health Data Exchange)           |
| 16                            | Report a quantitative measure of the uncertainty of the estimates (e.g. uncertainty intervals).                                                                                                                                                                         | Uncertainty intervals are provided with all results                                                                                           | Main text, appendix, and online data tools (data visualisation tools, data query tools, and the Global Health Data Exchange) |
| 17                            | Interpret results in light of existing evidence. If updating a previous set of estimates, describe the reasons for changes in estimates.                                                                                                                                | Discussion of methodological changes between GBD rounds provided in the narrative of the manuscript and appendix                              | Main text (Methods and Discussion) and appendix                                                                              |
| 18                            | Discuss limitations of the estimates. Include a discussion of any modelling assumptions or data limitations that affect interpretation of the estimates.                                                                                                                | Discussion of limitations provided in the narrative of the main paper, as well as in the methodological write-ups in the appendix             | Main text (Limitations) and appendix                                                                                         |
